# Supplementary material
Source: MDPI journal article supplement (https://www.mdpi.com/2077-1444/11/5/249)
Supplement: s1 [file s1]

In the last twelve months, have you...

- Discussed politics with family and friends?
- Worked for a candidate, political party, or some other campaign organization?
- Contributed money to a candidate, political party, ballot issue, or some other campaign organization?
- Worn a campaign button, or posted a campaign sign or sticker?
- Contacted an elected representative or a government official in the U.S. in any way – such as through writing a letter, emailing, calling, or in person – about a policy or issue you care about?
- Contacted in any way, such as by letter, telephone, internet, or in person, a government office about a problem you have or to get help or information?
- Worked or cooperated with others to try to solve a problem affecting your city or neighborhood?
- Attended a meeting to discuss issues facing the community?
- Discussed a candidate or political issue on social media
- Attended a protest march, demonstration, or rally?
- Signed a petition regarding an issue or problem that concerns you?
- Boycotted a company or product for political reasons?

Yes..... 1

No..... 2

Do you participate in one or more than one social, cultural, civic, political group or union or do you not participate in the activities of any such groups?

Yes, one..... 1

Yes, more than one..... 2

None ..... 3

Were you born in the United States, [if Latino “on the Island of Puerto Rico,”] or another country?

United States.....1

Another country.....2

Puerto Rico.....3

Gender

Female..... 1

Male..... 2

When it comes to religion, do you consider yourself to be?

Catholic..... 1

Protestant ..... 2

Christian ..... 3

Muslim ..... 4

Hindu ..... 5

Buddhist ..... 6

Other: [SPECIFY] ..... 7

Atheist or agnostic..... 8

None ..... 9

Do you consider yourself an evangelical or born-again?

Yes..... 1

No..... 2

Do you attend religious service or gathering: at least every week, almost every week, a few times a month, only a few times during the year, hardly ever or never?

At least every week ..... 1  
Almost every week..... 2  
A few times a month ..... 3  
Hardly ever..... 4  
Never..... 5

How similar would you say your political views are with most of the people in your:

- Church  
Very Similar..... 1  
Somewhat Similar..... 2  
Not Very Similar..... 3  
Not Similar at All.....4

Do you think what happens generally to {ANS to S2} people in this country will have something to do with what happens in your life? Will it affect you:

Yes..... 1  
No..... 2  
A lot..... 1  
Some ..... 2  
Not very much..... 3

In your opinion, were you unfairly treated because of your

- Racial background or ethnicity
- Religion  
Yes..... 1  
No..... 2
